# Supplementary material
Source: publisher site journal article supplement (https://www.dovepress.com/article/590772)
Supplement: Supplementary file 1 [file 590772%20Supplementary%20Materials.docx]

**Appendix 1**

## Interview Guide

### Opening questions

1. Could you briefly describe your experience since undergoing atrial fibrillation ablation?
2. How has your physical or psychological condition changed after discharge?
3. Have you attended any follow-up visits after ablation? If yes, what were these follow-up visits mainly about?

### Core questions

**1. Perceived priorities during follow-up**

1. In your opinion, what aspects are most important to monitor or assess during follow-up after ablation?
2. Which issues do you pay the most attention to after discharge, such as symptoms, examination results, medication use, psychological status, sleep, daily activities, or recurrence?
3. Are there any symptoms or changes that make you particularly worried?
4. What information do you hope healthcare professionals will explain more clearly during follow-up?

**2. Limitations of current follow-up care**

1. What difficulties or inconveniences have you experienced during follow-up after ablation?
2. What do you think is lacking in the current follow-up process?
3. Were there any problems that you wanted to discuss but did not have the opportunity to ask?
4. What aspects of follow-up do you think should be improved?

**3. Common post-discharge consultation needs**

1. After discharge, what issues do you most often want to ask healthcare professionals about?
2. When you experience discomfort or uncertainty at home, how do you usually deal with it?
3. What kinds of guidance would help you manage your condition better after ablation?
4. Have you ever searched for information by yourself or asked family members, friends, or other patients for advice? Was it helpful?

**4. Factors influencing willingness to participate in follow-up**

1. What factors make you more willing to attend follow-up after discharge?
2. What factors make it difficult for you to attend follow-up regularly?
3. What kind of follow-up method would be more acceptable to you, such as outpatient visits, telephone follow-up, WeChat follow-up, online consultation, or remote monitoring?

**Appendix 2**

****Follow-up Checklist for Patients after Atrial Fibrillation Radiofrequency Ablation Expert Consultation Form****

**Expert Questionnaire (First Round)**

Dear Expert：

Thank you for your support of this research amidst your busy schedule!I am Shi Xiushan, Head Nurse of the Cardiovascular Department at Shanxi Bethune Hospital. I am currently undertaking research on the ‘Follow-up Checklist Questionnaire for Patients Post-Radiofrequency Ablation for Atrial Fibrillation’. The objective of this phase is to develop a shared follow-up checklist for healthcare professionals and patients post-radiofrequency ablation for atrial fibrillation. To further clarify the follow-up content for these patients, The questionnaire items employ an evidence-based methodology, developed through comprehensive literature review and evaluation of domestic and international AF follow-up studies, combined with clinical practice. This aims to standardise the clinical follow-up pathway for AF patients, enabling more effective long-term, timely, and continuous monitoring. Consequently, it assists patients in adjusting their lifestyle, improving treatment adherence, and reducing the incidence of complications.

Given your extensive expertise and distinguished academic standing in cardiovascular medicine, chronic disease management, nursing administration, and nursing research, we invite you to serve as a consulting expert for this project. We kindly request that you find time amidst your busy schedule to complete the enclosed questionnaire. Your evaluation of the importance of primary, secondary, and tertiary indicators within the indicator system will enable this study to determine the weighting of the indicator framework. Please carefully review the instructions before completing the form to understand the methodology.

We sincerely request your feedback on the consultation form within one week, if possible. We extend our heartfelt gratitude for your support and contribution to this research. Wishing you every success in your work and good health!

Contact Person: Xiushan Shi

Telephone: 13934521063

E-mail：390496406@qq.com

Part I: Expert Evaluation Section

Instructions for Completing the Form:

Table A1 presents the primary, secondary, and tertiary indicators for the “Post-Radiofrequency Ablation Follow-up Checklist for Atrial Fibrillation Patients” developed by our team. Importance levels are categorised as follows: 5 points = highly important; 4 points = relatively important; 3 points = moderately important; 2 points = not very important; 1 point = not important. Please assign scores in the ‘Importance Rating’ column based on your assessment. Should you identify any issues with the wording of an item, or propose additions or deletions, kindly note your suggested modifications or deletions in the ‘Revision Comments’ or ‘Suggestions’ section.

Table A1: Follow-up Checklist for Patients Post-Radiofrequency Ablation for Atrial Fibrillation: Expert Consultation Questionnaire

| Sbject | Indicator Revision Comments | Suggestions |
| --- | --- | --- |
| 1Anticoagulation and stroke prevention |  |  |
| 1.1 anticoagulant therapy |  |  |
| 1.1.1 Type of anticoagulant |  |  |
| 1.1.2 Anticoagulant dose |  |  |
| 1.1.3 Anticoagulation compliance assessment |  |  |
| 1.1.4 Screening for drug interactions |  |  |
| 1.1.5 Coagulation index monitoring frequency and compliance rate |  |  |
| 1.1.6 Assessment of anticoagulation continuity 3 months after surgery |  |  |
| 1.1.7 Hemoglobin and platelet count |  |  |
| 1.2 Bleeding tendency and evaluation |  |  |
| 1.2.1 Bleeding Risk Assessment (HAS-BLED Score) |  |  |
| 1.2.2 Access site complications (hematoma/infection/vagal reflex/pseudoaneurysm) |  |  |
| 1.2.3 Bleeding (gum bleeding, bruising of the skin, conjunctival bleeding, hematuria, melena) |  |  |
| 1.2.4 Risk Screening for Left Atrial Esophageal Fistula |  |  |
| 1.3 Stroke prevention and management |  |  |
| 1.3.1 Stroke Risk Assessment (CHA2DS2-VASc Score) |  |  |
| 1.3.2 Documentation of thrombotic events (stroke/TIA/pulmonary embolism/deep vein thrombosis of lower extremities) |  |  |
| 2 Symptom control and rhythm management |  |  |
| 2.1 antiarrhythmic therapy |  |  |
| 2.1.1 Rate/rhythm control dose |  |  |
| 2.1.2 Kind of Rate/Rhythm Control |  |  |
| 2.1.3 Resting heart rate and maximum heart rate during activity |  |  |
| 2.1.4 Heart rate/rhythm monitoring and management |  |  |
| 2.1.5 Use of smart devices (asymptomatic atrial fibrillation, ECG monitoring bracelet data analysis ≥1 time/week) |  |  |
| 2.1.6 Ablation Line Integrity Assessment |  |  |
| 2.1.7 Monitoring of risk of conversion of atrial flutter/tachycardia |  |  |
| 2.2 symptom identification |  |  |
| 2.2.1 Frequency of AF-related symptoms (palpitations, shortness of breath, chest pain, syncope) |  |  |
| 2.2.2 Symptom assessment and grading (EHRA symptom scale) |  |  |
| 2.2.3 Symptom coping style and ability (e.g., self-measured pulse in case of sudden palpitations, indication for immediate medical attention) |  |  |
| 2.2.4 Stroke related symptoms |  |  |
| 2.2.5 Symptoms of peripheral arterial embolism |  |  |
| 2.3 Af burden |  |  |
| 2.3.1 Cardiac ultrasound (left atrial diameter, left ventricular ejection fraction, assessed every 6 months) |  |  |
| 2.3.2 BNP/NT-proBNP levels (measured every 3 months, target <300 pg/mL) |  |  |
| 2.3.3 ECG |  |  |
| 2.3.4 dynamic electrocardiogram |  |  |
| 3 Risk factors/Complication control |  |  |
| 3.1 Hazard factor control |  |  |
| 3.1.1 Hypertension control success rate (ambulatory blood pressure monitoring) |  |  |
| 3.1.2 Diabetes management (HbA1c monitoring and medication adjustment) |  |  |
| 3.1.3 Lipid management (LDL-C 1.8 mmol/L, statin compliance) |  |  |
| 3.1.4 Obesity and metabolic syndrome intervention (BMI/waist circumference recording) |  |  |
| 3.1.5 Sleep disordered breathing screening |  |  |
| 3.1.6 Liver and kidney function, thyroid function index |  |  |
| 3.2 lifestyle intervention |  |  |
| 3.2.1 Exercise (amount of exercise, exercise contraindications, indications for termination of exercise, etc.) |  |  |
| 3.2.2 diet management |  |  |
| 3.2.3 sleep quality |  |  |
| 3.2.4 Smoking cessation |  |  |
| 3.2.5 Alcohol restriction |  |  |
| 3.3 Psychological and social support |  |  |
| 3.3.1 Mental status screening (SAS/SDS scale) |  |  |
| 3.3.2 Assessment of Family Support (APGAR Scale) |  |  |
| 3.3.3 Effect of financial burden on treatment (proportion of discontinuations of self-paid medication use) |  |  |
| 3.3.4 Quality of Life Assessment (AF-QoL Scale) |  |  |

Part II: Expert Profile Questionnaire

Table A2: Basis for Expert Responses

Instructions: Please tick the appropriate box with a ‘√’.

| Criteria for Judgement | Expert Self-Assessment | | |
| --- | --- | --- | --- |
| Large | Medium | Small |
| Theoretical Analysis |  |  |  |
| Practical Experience |  |  |  |
| Domestic and international literature |  |  |  |
| Intuitive Judgement |  |  |  |

Table A3. Experts' Familiarity with the Content of the Questionnaire

**Instructions for Filling:** Please mark "√" in the appropriate column.

| **Survey Content** | **Familiarity Level** | | | | |
| --- | --- | --- | --- | --- | --- |
| Very Familiar | | Relatively Familiar | Familiar | | Not Very Familiar | Unfamiliar |
| Expert Self-Assessment |  |  |  |  |  |

| Part Ⅲ  Dear Expert:  We extend our sincere gratitude for your invaluable support of this research initiative. Kindly complete the relevant details in the form below. Our institute will shortly issue your expert consultation fee. Once again, thank you for your contribution to this project.  **Detailed Statement for Receiving Service Fee / Expert Consultation Fee / Lecture Fee** | | | | | |
| --- | --- | --- | --- | --- | --- |
| Name | ID Card Number | Bank Card Account Number | Bank of Account | Phone Number | E-signature |
|  |  |  |  |  |  |

**Appendix 3**

****Follow-up Checklist for Patients after Atrial Fibrillation Radiofrequency Ablation Expert Consultation Form****

****Expert Consultation Questionnaire (Second Round)****

Dear Expert：

We extend our sincere gratitude for the valuable time you devoted to our research project and the insightful suggestions you provided during the first round of consultation. With your invaluable support, the initial consultation for the ‘Follow-up Checklist for Patients Post-Radiofrequency Ablation for Atrial Fibrillation’ has been successfully completed. Having analysed and synthesised the feedback from all experts, we are pleased to share the outcomes of this first consultation with you. We kindly request your continued guidance on the revised questionnaire. We extend our gratitude once more for your guidance amidst your busy schedule. Given the project's time constraints, we kindly request your response within two weeks. Should you have any queries, please do not hesitate to contact us. We sincerely hope you will share your valuable insights and suggestions. We are deeply appreciative of your support and assistance for this research. Wishing you good health and success in your endeavours.

Contact Person: Xiushan Shi

Telephone: 13934521063

E-mail：390496406@qq.com

Part I: Expert Evaluation Section

Instructions for Completing the Form:

Table B1 presents the revised indicators at various levels, based on the outcomes of the first round of expert consultation. Importance is rated on a five-point scale:5 points = Very important,4 points = Quite important,3 points = Moderately important,2 points = Not very important,1 point = Not important.Please assign a score in the ‘Importance Assessment’ column according to your judgement. Should you have any comments, suggestions, or queries regarding an item, please note these in the ‘Indicator Revision Comments’ section. Thank you.

Table B1: Follow-up Checklist for Patients Post-Radiofrequency Ablation for Atrial Fibrillation: Expert Consultation Questionnaire

| Sbject | Indicator Revision Comments | Suggestions |
| --- | --- | --- |
| 1Anticoagulation and stroke prevention |  |  |
| 1.1 anticoagulant therapy |  |  |
| 1.1.1 Anticoagulant drug type and dose (check) |  |  |
| 1.1.2 Anticoagulation compliance assessment |  |  |
| 1.1.3 Screening for drug interactions |  |  |
| 1.1.4 Coagulation index monitoring frequency and compliance rate |  |  |
| 1.1.5 Hemoglobin and platelet count |  |  |
| 1.2 Bleeding tendency and evaluation |  |  |
| 1.2.1 Bleeding Risk Assessment (HAS-BLED Score) |  |  |
| 1.2.2 Access site complications (hematoma/infection/vagal reflex/pseudoaneurysm) |  |  |
| 1.2.3 Bleeding (gum bleeding, bruising of the skin, conjunctival bleeding, hematuria, melena) |  |  |
| 1.3 Stroke prevention and management |  |  |
| 1.3.1 Stroke Risk Assessment (CHA2DS2-VASc Score) |  |  |
| 1.3.2 Documentation of thrombotic events (stroke/TIA/pulmonary embolism/deep vein thrombosis of lower extremities) |  |  |
| 2 Symptom control and rhythm management |  |  |
| 2.1 antiarrhythmic treatment |  |  |
| 2.1.1 Type and dosage of heart rate/rhythm control (medication verification) |  |  |
| 2.1.2 Resting heart rate and maximum heart rate during activity |  |  |
| 2.1.3 Heart rate/rhythm monitoring and management |  |  |
| 2.1.4 Use of smart devices (asymptomatic atrial fibrillation, ECG monitoring bracelet data analysis ≥1 time/week) |  |  |
| 2.2 symptom identification |  |  |
| 2.2.1 Frequency of AF-related symptoms (palpitations, shortness of breath, chest pain, syncope) |  |  |
| 2.2.2 Symptom Assessment and Grading (EHRA Symptom Scale) |  |  |
| 2.2.3 Symptom coping style and ability (e.g., self-measured pulse in case of sudden palpitations, indication for immediate medical attention) |  |  |
| 2.2.4 Stroke related symptoms |  |  |
| 2.2.5 Symptoms of peripheral arterial embolism |  |  |
| 2.3 Af burden |  |  |
| 2.3.1 Cardiac ultrasound (left atrial diameter, left ventricular ejection fraction) |  |  |
| 2.3.2 BNP/NT-proBNP levels |  |  |
| 2.3.3 ECG |  |  |
| 2.3.4 dynamic electrocardiogram |  |  |
| 3 Risk factors/complication control |  |  |
| 3.1 Hazard factor control |  |  |
| 3.1.1 Hypertension control success rate (ambulatory blood pressure monitoring) |  |  |
| 3.1.2 Diabetes management (HbA1c monitoring and medication adjustment) |  |  |
| 3.1.3 Lipid management (LDL-C 1.8 mmol/L, statin compliance) |  |  |
| 3.1.4 Obesity and metabolic syndrome intervention (BMI/waist circumference recording) |  |  |
| 3.1.5 Sleep disordered breathing screening |  |  |
| 3.1.6 Liver and kidney function, thyroid function index |  |  |
| 3.2 lifestyle intervention |  |  |
| 3.2.1 Exercise (amount of exercise, exercise contraindications, indications for termination of exercise, etc.) |  |  |
| 3.2.2 diet management |  |  |
| 3.2.3 sleep quality |  |  |
| 3.2.4 Smoking cessation |  |  |
| 3.2.5 Alcohol restriction |  |  |
| 3.3 Psychological and social support |  |  |
| 3.3.1 Mental status screening (SAS/SDS scale) |  |  |
| 3.3.2 Assessment of Family Support (APGAR Scale) |  |  |
| 3.3.3 Effect of financial burden on treatment (proportion of self-paid drug interruptions) |  |  |
| 3.3.4 Quality of Life Assessment (AF-QoL Scale) |  |  |

Part II: Expert Profile Questionnaire

Table B2: Basis for Expert Responses

Instructions: Please tick the appropriate box with a ‘√’.

| Criteria for Judgement | Expert Self-Assessment | | |
| --- | --- | --- | --- |
| Large | Medium | Small |
| Theoretical Analysis |  |  |  |
| Practical Experience |  |  |  |
| Domestic and international literature |  |  |  |
| Intuitive Judgement |  |  |  |

Table B3. Experts' Familiarity with the Content of the Questionnaire

**Instructions for Filling:** Please mark "√" in the appropriate column.

| **Survey Content** | **Familiarity Level** | | | | |
| --- | --- | --- | --- | --- | --- |
| Very Familiar | | Relatively Familiar | Familiar | | Not Very Familiar | Unfamiliar |
| Expert Self-Assessment |  |  |  |  |  |

| Part Ⅲ  Dear Expert:  We extend our sincere gratitude for your invaluable support of this research initiative. Kindly complete the relevant details in the form below. Our institute will shortly issue your expert consultation fee. Once again, thank you for your contribution to this project.  **Detailed Statement for Receiving Service Fee / Expert Consultation Fee / Lecture Fee** | | | | | |
| --- | --- | --- | --- | --- | --- |
| Name | ID Card Number | Bank Card Account Number | Bank of Account | Phone Number | E-signature |
|  |  |  |  |  |  |
